# Supplementary material for: Improved liquid–liquid extraction by modified magnetic nanoparticles for the detection of eight drugs in human blood by HPLC-MS
Source: Royal Society of Chemistry journal article supplement (doi:10.1039/d1ra01530c), 2021-01-01
Supplement: d1ra01530c1.pdf [file d1ra01530c1.pdf]

**Improved liquid-liquid extraction by modified magnetic nanoparticles for  
detection of 8 drugs in human blood by HPLC-MS**

Feiyu Yang\*, Ke Ma, Yu Cao, Chunfang Ni

Shanghai Key Laboratory of Crime Scene Evidence, Shanghai Research Institute of  
Criminal Science and Technology, Shanghai 200083, China

\*Corresponding author. Fax: +86 021 22028363

E-mail address: [yangfyhit@sina.com](mailto:yangfyhit@sina.com)

Fig.S1 (A) SEM images  $\text{Fe}_3\text{O}_4@\text{mTiO}_2$ ; (B) EDS images of point1#-3 (C)EDS images of point1#-4 (gold  
sputtering element Pt was not labeled in about 2.1keV)

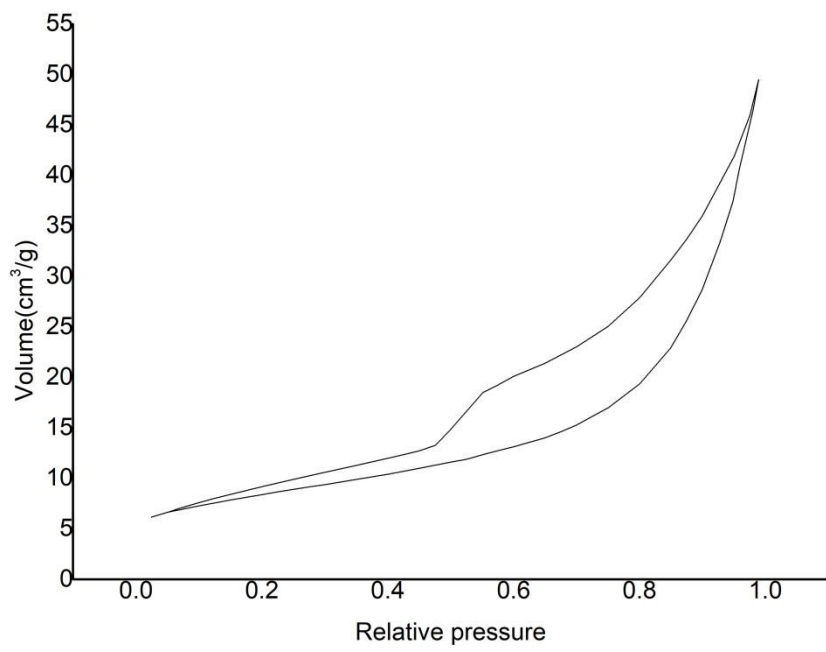

Fig.S2 Graph of N<sub>2</sub> adsorption-desorption isotherms by Fe<sub>3</sub>O<sub>4</sub>@TiO<sub>2</sub>
